# Supplementary material for: Impact of the COVID-19 epidemic on patterns of pregnant women’s perception of threat and its relationship to mental state: A latent class analysis
Source: PubMed Central journal article supplement (PMC7531823; doi:10.1371/journal.pone.0239697), 2020-10-02

## RESEARCH ETHICS COMMITTEE APPROVAL FORM

The Ethics Committee of Wenjiang District People's Hospital of Chengdu voted at its meeting on 22/05/2020 to give final APPROVAL for the study "Construction of multiple predictive models of maternal negative emotions and comparison of their effects" Project source: Sichuan Science and Technology Department (No: 2020JDRC0135) which is conducted by Mengsha Qi at Department of Science and Education, Wenjiang District People's Hospital, Chengdu.

### The following documents were reviewed and approved:

1. Protocol
2. Informed Consent Document
3. Summary Sheet
4. List of Research Worker

This Ethics Committee is constituted in accordance with ICH-GCP, GCP is in china and Declaration of Helsinki(2009)

EC Chairperson/Designee:

  


Date 22/05/2020

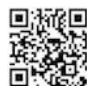

Supplement: pone.0239697.s002.pdf [file pone.0239697.s002.pdf]
